# Supplementary material for: Neuroprotective and Antiapoptotic Activity of Lineage-Negative Bone Marrow Cells after Intravitreal Injection in a Mouse Model of Acute Retinal Injury
Source: PubMed Central journal article supplement (PMC4354968; doi:10.1155/2015/620364), 2015-02-24
Supplement: 620364.f1.pdf [file 620364.f1.pdf]

**Table S1:** Top 25 down-regulated genes in retinas injected with Lin<sup>-</sup>BMCs compared to retinas from PBS-treated eyes on the 7<sup>th</sup> day post NaIO<sub>3</sub>-injury.

| Probe ID | Gene Symbol | log <sub>2</sub> (right eye/left eye) | Gene Name                                                                            | Entrez GeneID |
|----------|-------------|---------------------------------------|--------------------------------------------------------------------------------------|---------------|
| 10342383 | Rab14       | -5,05                                 | RAB14, member RAS oncogene family                                                    | 68365         |
| 10340656 | Der1        | -4,97                                 | Der1-like domain family, member 1                                                    | 67819         |
| 10341530 | Ddb1        | -4,43                                 | damage specific DNA binding protein 1                                                | 13194         |
| 10569017 | Ifitm3      | -4,41                                 | interferon induced transmembrane protein 3                                           | 66141         |
| 10341637 | Psap        | -4,41                                 | prosaposin                                                                           | 19156         |
| 10338802 | Psmb5       | -4,33                                 | proteasome (prosome, macropain) subunit, beta type 5                                 | 19173         |
| 10343152 | Anapc1      | -4,32                                 | anaphase promoting complex subunit 1                                                 | 17222         |
| 10338683 | Argef1      | -4,28                                 | ADP-ribosylation factor guanine nucleotide-exchange factor 1 (brefeldin A-inhibited) | 211673        |
| 10338120 | Psm1        | -4,24                                 | proteasome (prosome, macropain) subunit, alpha type 1                                | 26440         |
| 10340293 | Rab7        | -4,09                                 | RAB7, member RAS oncogene family                                                     | 19349         |
| 10342263 | Rragc       | -4,09                                 | Ras-related GTP binding C                                                            | 54170         |
| 10344078 | Itch        | -4,04                                 | itchy, E3 ubiquitin protein ligase                                                   | 16396         |
| 10480734 | Ptgds       | -3,98                                 | prostaglandin D2 synthase (brain)                                                    | 19215         |
| 10475414 | B2m         | -3,93                                 | beta-2 microglobulin                                                                 | 12010         |
| 10511363 | Penk        | -3,78                                 | preproenkephalin                                                                     | 18619         |
| 10523717 | Spp1        | -3,76                                 | secreted phosphoprotein 1                                                            | 20750         |
| 10365482 | Timp3       | -3,75                                 | tissue inhibitor of metalloproteinase 3                                              | 21859         |
| 10362896 | Cd24a       | -3,43                                 | CD24a antigen                                                                        | 12484         |
| 10481627 | Lcn2        | -3,17                                 | lipocalin 2                                                                          | 16819         |
| 10485466 | Cat         | -2,76                                 | catalase                                                                             | 12359         |
| 10441815 | Sod2        | -2,34                                 | superoxide dismutase 2, mitochondrial                                                | 20656         |
| 10449303 | Bak1        | -2,18                                 | BCL2-antagonist/killer 1                                                             | 12018         |
| 10467139 | Lipa        | -2,76                                 | lysosomal acid lipase A                                                              | 16889         |
| 10536494 | Cav2        | -2,69                                 | caveolin 2                                                                           | 12390         |
| 10488415 | Cst3        | -2,69                                 | cystatin C                                                                           | 13010         |

**Table S2:** Top 25 up-regulated genes in retinas injected with Lin<sup>-</sup>BMCs compared to retinas from PBS-treated eyes on the 7<sup>th</sup> day post NaIO<sub>3</sub>-injury.

| Probe ID | Gene Symbol | log <sub>2</sub> (right eye/left eye) | GeneName                                          | Entrez GeneID |
|----------|-------------|---------------------------------------|---------------------------------------------------|---------------|
| 10377429 | Tmem107     | 5,23                                  | transmembrane protein 107                         | 66910         |
| 10598087 | mt-Nd6      | 4,85                                  | mitochondrially encoded NADH dehydrogenase 6      | 17722         |
| 10598071 | mt-Cytb     | 4,39                                  | mitochondrially encoded cytochrome b              | 17711         |
| 10565811 | Rps3        | 2,93                                  | ribosomal protein S3                              | 27050         |
| 10560746 | Nlrp4e      | 2,74                                  | NLR family, pyrin domain containing 4E            | 446099        |
| 10566684 | Olf488      | 2,6                                   | olfactory receptor 488                            | 258727        |
| 10566387 | Dub3        | 2,56                                  | deubiquitinating enzyme 3                         | 625530        |
| 10447647 | Gpr31c      | 2,52                                  | G protein-coupled receptor 31, D17Leh66c region   | 436440        |
| 10388286 | Olf395      | 2,5                                   | olfactory receptor 395                            | 259007        |
| 10383632 | Sfi1        | 2,47                                  | Sfi1 homolog, spindle assembly associated (yeast) | 78887         |
| 10566692 | Olf502      | 2,46                                  | olfactory receptor 502                            | 258734        |
| 10389668 | Olf462      | 2,38                                  | olfactory receptor 462                            | 258406        |
| 10554731 | Olf293      | 2,32                                  | olfactory receptor 293                            | 257906        |
| 10340689 | Zfp518a     | 2,32                                  | zinc finger protein 518A                          | 72672         |
| 10547171 | Olf215      | 2,3                                   | olfactory receptor 215                            | 258438        |
| 10493860 | Spr2b       | 2,27                                  | small proline-rich protein 2B                     | 20756         |
| 10556131 | Olf483      | 2,27                                  | olfactory receptor 483                            | 258730        |
| 10566611 | Olf707      | 2,23                                  | olfactory receptor 707                            | 194433        |
| 10556129 | Olf481      | 2,21                                  | olfactory receptor 481                            | 258927        |
| 10556154 | Olf506      | 2,2                                   | olfactory receptor 506                            | 258215        |
| 10515828 | Olf1335     | 2,2                                   | olfactory receptor 1335                           | 435804        |
| 10471782 | Olf368      | 2,16                                  | olfactory receptor 368                            | 258371        |
| 10367507 | Olf792      | 2,16                                  | olfactory receptor 792                            | 258150        |
| 10566626 | Olf715      | 2,15                                  | olfactory receptor 715                            | 258776        |
| 10471745 | Olf342      | 2,11                                  | olfactory receptor 342                            | 258950        |
| 10544436 | Olf458      | 2,1                                   | olfactory receptor 458                            | 258436        |
